# Supplementary material for: Unhygienic Practices of Health Professionals in Brazilian Public Hospital Restaurants: An Alert to Promote New Policies and Hygiene Practices in the Hospitals
Source: MDPI journal article supplement (doi:10.3390/ijerph16071224), 2019-04-05
Supplement: s1 [file s1]

**Table S2.** Unhygienic practices instrument part 1: registration of the wearing of work uniforms and working instruments, hand washing and/or the use of alcohol gel.

| Consumer | Use of work uniforms<br>(Yes/No) | Use of working instruments<br>(Yes/No) | Hand hygiene with water and soap<br>(Yes/No) | Hand hygiene with alcohol gel<br>(Yes/No) |
|----------|----------------------------------|----------------------------------------|----------------------------------------------|-------------------------------------------|
| 1        |                                  |                                        |                                              |                                           |
| 2        |                                  |                                        |                                              |                                           |
| 3        |                                  |                                        |                                              |                                           |
| 4        |                                  |                                        |                                              |                                           |
| 5        |                                  |                                        |                                              |                                           |
| 6        |                                  |                                        |                                              |                                           |
| 7        |                                  |                                        |                                              |                                           |
| 8        |                                  |                                        |                                              |                                           |
| 9        |                                  |                                        |                                              |                                           |
| 10       |                                  |                                        |                                              |                                           |
| 11       |                                  |                                        |                                              |                                           |
| 12       |                                  |                                        |                                              |                                           |
| 13       |                                  |                                        |                                              |                                           |
| 14       |                                  |                                        |                                              |                                           |
| 15       |                                  |                                        |                                              |                                           |
| 16       |                                  |                                        |                                              |                                           |
| 17       |                                  |                                        |                                              |                                           |
| 18       |                                  |                                        |                                              |                                           |
| 19       |                                  |                                        |                                              |                                           |
| 20       |                                  |                                        |                                              |                                           |



**Table S4.** Questionnaire to identify the stage of behavioural change in regard to unhygienic practices in hospital restaurants

| <b>Questionnaire to identify the stage of behavioural change in regard to unhygienic practices in hospital restaurants</b>                                                                                                                                                                                                                                                                                                                                                                                                                                                                                                                      |  |
|-------------------------------------------------------------------------------------------------------------------------------------------------------------------------------------------------------------------------------------------------------------------------------------------------------------------------------------------------------------------------------------------------------------------------------------------------------------------------------------------------------------------------------------------------------------------------------------------------------------------------------------------------|--|
| <b>1) Date of birth?</b><br><br>__ __ / __ __ / __ __                                                                                                                                                                                                                                                                                                                                                                                                                                                                                                                                                                                           |  |
| <b>2) Gender?</b><br>1. <input type="checkbox"/> Male<br>2. <input type="checkbox"/> Female                                                                                                                                                                                                                                                                                                                                                                                                                                                                                                                                                     |  |
| <b>3) What is your educational level?</b><br>1. <input type="radio"/> Illiterate<br>2. <input type="radio"/> Incomplete elementary<br>3. <input type="radio"/> Complete elementary<br>4. <input type="radio"/> Incomplete high school<br>5. <input type="radio"/> Complete high school<br>6. <input type="radio"/> Incomplete undergraduate<br>7. <input type="radio"/> Complete undergraduate<br>8. <input type="radio"/> Special education                                                                                                                                                                                                    |  |
| <b>4) What is your job position?</b><br>1. <input type="checkbox"/> Doctor<br>2. <input type="checkbox"/> Nursery<br>3. <input type="checkbox"/> Dentist<br>4. <input type="checkbox"/> Chemist<br>5. <input type="checkbox"/> Nutritionist<br>6. <input type="checkbox"/> Nursing technician<br>7. <input type="checkbox"/> General Service Assistant<br>8. <input type="checkbox"/> Cleaning assistant<br>9. <input type="checkbox"/> Administrative agent<br>10. <input type="checkbox"/> Other: _____                                                                                                                                       |  |
| <b>4) What is your working sector at the hospital?</b><br>1. <input type="radio"/> First aid<br>2. <input type="radio"/> Maternity<br>3. <input type="radio"/> Surgical Center<br>4. <input type="radio"/> Medical Clinic<br>5. <input type="radio"/> Pediatrics<br>6. <input type="radio"/> Administration<br>7. <input type="radio"/> Laundry<br>8. <input type="radio"/> Intensive care unit<br>9. <input type="radio"/> Pharmacy<br>10. <input type="radio"/> Other: _____                                                                                                                                                                  |  |
| <b>For each of the questions below, check the option that best represents your behavior in the following situations:</b>                                                                                                                                                                                                                                                                                                                                                                                                                                                                                                                        |  |
| <b>5) Hygiene of the hands before meals.</b><br>1. <input type="radio"/> I do not do it, and I do not feel like doing it.<br>2. <input type="radio"/> I do not perform it, but I know that I need to change and perform it properly. I intend to do this within six months.<br>3. <input type="radio"/> I do not perform it, but I know I need to change and perform it properly. I intend to do this within 30 days.<br>4. <input type="radio"/> I performed adequately and started to perform adequately less than six months ago.<br>5. <input type="radio"/> I perform properly and have been performing properly for more than six months. |  |
| <b>6) Use of work clothes at the hospital restaurant.</b> Note that working clothes are protective clothing used in the work environment, such as lab coats, aprons, caps, hats, masks and so on.<br>1. <input type="radio"/> I use working clothes and I do not feel like stopping wearing my clothes while I serve and consume the food.                                                                                                                                                                                                                                                                                                      |  |

|                                                                                                                                                                                                                                                                                                                                                                                                                                                                                                                                                                                                                                                                                                                                                                       |  |
|-----------------------------------------------------------------------------------------------------------------------------------------------------------------------------------------------------------------------------------------------------------------------------------------------------------------------------------------------------------------------------------------------------------------------------------------------------------------------------------------------------------------------------------------------------------------------------------------------------------------------------------------------------------------------------------------------------------------------------------------------------------------------|--|
| <p>2. ☉ I wear my work clothes, but I know I need to change and stop using them while I serve and consume food. I intend to do this within six months.</p> <p>3. ☉ I wear my work clothes, but I know I need to change and stop using them while I serve and consume food. I intend to do this within 30 days.</p> <p>4. ☉ I do not wear my work clothes while I serve and consume food and I have changed my behavior for less than six months.</p> <p>5. ☉ I do not wear my work clothes while I serve and consume food, and I have changed my behavior for more than six months.</p> <p>6. ☉ My work environment does not require the use of work clothes.</p>                                                                                                     |  |
| <p><b>7) Bringing work tools to the hospital restaurant.</b></p> <p>1. ☉ I take my work tools, and I do not feel like stopping taking my work tools to the restaurant.</p> <p>2. ☉ I take my work tools, but I know I need to change and stop taking them to the restaurant. I intend to do this within six months.</p> <p>3. ☉ I take my work tools, but I know I need to change and stop taking them to the restaurant. I intend to do this within 30 days.</p> <p>4. ☉ I do not take my work tools to the restaurant and I changed my behavior for less than six months.</p> <p>5. ☉ I do not take my work tools to the restaurant and I changed my behavior more than six months ago.</p> <p>6. ☉ My work environment does not require the use of work tools.</p> |  |
| <p><b>8) Talking, sneezing, coughing while serving.</b></p> <p>1. ☉ I perform these actions, and I have no desire to stop doing these actions.</p> <p>2. ☉ I perform these actions, but I know I need to change. I intend to do this within six months.</p> <p>3. ☉ I perform these actions, but I know I need to change. I intend to do this within 30 days.</p> <p>4. ☉ I have not performed these actions and I changed my behavior for less than six months.</p> <p>5. ☉ I have not performed these actions and I changed my behavior for more than six months.</p>                                                                                                                                                                                               |  |
| <p><b>9) Eating/trying the food when serving.</b></p> <p>1. ☉ I eat while I am serving, and I do not feel like stopping eating while I'm serving.</p> <p>2. ☉ I eat while I am serving, but I know I need to change, and I intend to do so in 6 months.</p> <p>3. ☉ I eat while I am serving, but I know I need to change, and I intend to do so in 30 days.</p> <p>4. ☉ I do not eat while serving and I changed my behavior less than six months ago.</p> <p>5. ☉ I do not eat while serving and I changed my behavior more than six months ago.</p>                                                                                                                                                                                                                |  |
| <p><b>10) Touching hair while serving.</b> Note that this includes wiggling your hair as well as scratching, ironing, or straightening your hair regardless of its length.</p> <p>1. ☉ I perform this action, and I have no desire to stop doing this action.</p>                                                                                                                                                                                                                                                                                                                                                                                                                                                                                                     |  |

|                                                                                                                                                                                                                                                                                                                                                                                                                                                                                                                                                                                                                                                                                                                                                                          |  |
|--------------------------------------------------------------------------------------------------------------------------------------------------------------------------------------------------------------------------------------------------------------------------------------------------------------------------------------------------------------------------------------------------------------------------------------------------------------------------------------------------------------------------------------------------------------------------------------------------------------------------------------------------------------------------------------------------------------------------------------------------------------------------|--|
| <p>2. ☉ I perform this action, but I know I need to change. I intend to do this within six months.</p> <p>3. ☉ I perform this action, but I know I need to change. I intend to do this within 30 days.</p> <p>4. ☉ I did not do this and I changed my behavior less than six months ago.</p> <p>5. ☉ I did not do this and I changed my behavior more than six months ago.</p>                                                                                                                                                                                                                                                                                                                                                                                           |  |
| <p><b>11) Setting the food on the plate with utensils used to serve.</b></p> <p>1. ☉ I arrange the food with the utensils used to serve me, and I do not feel like stopping setting the food on my plate with the utensils.</p> <p>2. ☉ I arrange the food with the utensils used to serve me, but I know I need to change. I intend to do this within six months.</p> <p>3. ☉ I arrange the food with the utensils used to serve me, but I know I need to change. I intend to do this within 30 days.</p> <p>4. ☉ I do not arrange food with utensils used to serve me and I changed my behavior less than six months ago.</p> <p>5. ☉ I do not arrange food with utensils used to serve me and I changed my behavior more than six months ago.</p>                     |  |
| <p><b>12) Removing food from the plate and returning it to the vats with your hands or available utensil.</b></p> <p>1. ☉ I return food and I do not feel like stopping returning the food to the vats.</p> <p>2. ☉ I return food, but I know that I must change. I intend to do this within six months.</p> <p>3. ☉ I return food, but I know that I must change. I intend to do this within 30 days.</p> <p>4. ☉ I did not return food and I changed my behavior less than six months ago.</p> <p>5. ☉ I did not return food and I changed my behavior more than six months ago.</p>                                                                                                                                                                                   |  |
| <p><b>13) Serving the food with your hands.</b> Note that this includes using your hands to pick up any food from the dispensing counter or if the food falls accidentally, you put it back on the plate using your hands. Example: salad, fried foods, seasonings, bread, etc.</p> <p>1. ☉ I serve with my hands, and I do not feel like stopping serving with my hands.</p> <p>2. ☉ I serve with my hands, but I know I need to change, and I intend to do it in 6 months.</p> <p>3. ☉ I serve with my hands, but I know I need to change, and I intend to do so in 30 days.</p> <p>4. ☉ I do not use my hands and I have changed my behavior for less than six months.</p> <p>5. ☉ I do not use my hands and I have changed my behavior for more than six months.</p> |  |
| <p>Thank you for your participation, your support was fundamental to the execution of this research!</p>                                                                                                                                                                                                                                                                                                                                                                                                                                                                                                                                                                                                                                                                 |  |
